1 **Biogenic methane cycling is controlled by microbial cohorts**

2 Rhiannon Mondav<sup>1,2</sup>, Gaëtan Martin<sup>3</sup>, Sari Peura<sup>3\*</sup>, Sarahi L. Garcia<sup>2</sup>

3

4

5 1 Institute of Ecology and Genetics, Uppsala University, 75236 Uppsala, Sweden

6 2 Department of Ecology, Environment, and Plant Sciences, Science for Life Laboratory,

7 Stockholm University, 10691 Stockholm, Sweden

8 3 Department of Forest Mycology and Plant Pathology, Science for Life Laboratory, Swedish

9 University of Agricultural Sciences, 75007 Uppsala, Sweden

10 \* Current address: Swedish Nuclear Fuel and Waste Management Co

11

12

13

14 Corresponding author: Sarahi L Garcia <[sarahi.garcia@su.se](mailto:sarahi.garcia@su.se)>

15

16

17 Keywords: methane, carbon cycle, networks, metabolic prediction, community

18

19 Running title: Methane cycling model communities

20

21 **Abstract**

22 The generation and consumption of methane by aquatic microbial communities is an  
23 important contribution to the global carbon budget. We sought to broaden understanding of  
24 consortia members and interactions by combining multiple methods including analysis of  
25 natural and cultivated microbial communities. By analysing the microbial community  
26 composition and co-occurrence patterns of a lake time-series we were able to identify  
27 potential consortia involved in methane cycling. In combination with methane flux, we also  
28 analysed the community composition and co-occurrence patterns of reduced microbial model  
29 communities with inoculum from the same lake. While the network analyses confirmed many  
30 known associations, when combined with results from mixed cultures, we noted new players  
31 in methane cycling. Cultivated model communities were shown to be an effective method to  
32 explore the rarer but still important players in methane cycling and for identifying new  
33 putative members. Here we show that using multiple methods to approach the complex  
34 problem of methane cycling consortia yields not just insights into the known taxa but  
35 highlights potential new members creating new hypotheses to be tested.

36

37

## 38 **Introduction**

39 Methane emissions from biogenic sources are determined by the ratio and activity of  
40 methanogenic microbes producing and methanotrophic microbes consuming this powerful  
41 greenhouse gas. Considering that methane is responsible for 17% to 20% of the radiative  
42 forcing component of global warming (1, 2), elucidating all players in the methane cycle  
43 involved in the net methane emissions from various biogenic sources is of utmost importance.  
44 It is known that methanotrophs can oxidize between 30 and 99% of CH<sub>4</sub> produced in the  
45 sediments and the water column before it reaches the atmosphere (3–6). However, the  
46 detection of methanotrophs in an environment does not necessarily correlate with  
47 methanotrophic activity, and other factors may determine whether methane is oxidized (7).  
48 One factor that may affect the rate or existence of methanotrophy is the composition of the  
49 microbial community. For example, it has been shown that aerobic methanotrophs can be  
50 active in anoxic waters when co-occurring with photosynthetic organisms (8), suggesting that  
51 the methanotrophs utilize oxygen liberated by these phototrophs for methane oxidation.  
52 However, discovering and pinpointing more of these symbiotic interactions is difficult in  
53 natural environments as the number of possible interacting organisms is very high. Methods  
54 to cultivate communities with reduced diversity have been developed (9) to overcome this  
55 limitation and study organisms in a model communities in conditions mimicking their natural  
56 habitat. In this method, environmental samples are diluted in filtered water from their own  
57 environment and microorganisms subsampled for cultivation. These so-called model  
58 communities are a powerful way to study the microbial interaction in a semi-natural  
59 environment (10). Model communities also provide tools for building hypotheses that could  
60 then be further tested by looking into interaction networks in time series of natural  
61 environments (11).  
62 For this study, we established 177 dilution-cultures model communities using samples from

63 Lake Lomtjärnan, a lake in Sweden with high methane concentrations in the water column to  
64 examine the methane cycling capacity of microbial assemblages. We also utilized a 2-week  
65 depth discrete timeseries taken from March to April 2016 to examine the network around the  
66 methane oxidizing communities in the actual lake. We hypothesize that the capacity to  
67 produce or oxidize methane is not only related to the presence of organisms with the known  
68 ability to produce or use methane, but that their cohorts might be key controllers in methane  
69 cycling.

70

## 71 **Materials and methods**

### 72 *Lake water collection and media preparation*

73 Environmental samples for the time-depth-series were collected and published previously  
74 (12). In brief, a sampling campaign including six time points was done in winter the last week  
75 of March and the first week of April 2016 on Lake Lomtjärnan. This small forest lake had an  
76 ice cover at the time of sampling and is located in central west region (Jämtland) of Sweden  
77 (Fig 1A). The surface area of the lake is about 1 ha, and the maximum depth is 3.5 m. The  
78 lake is located on a mire surrounded by a coniferous forest. At each sampling occasion,  
79 samples at six different depths (0.65 m, 1.0 m, 1.35 m, 1.85 m, 2.35 m, 2.75 m) were taken to  
80 create a time-depth-series of the lake totalling 35 samples. The deepest depth was not taken  
81 on the first sampling because samples were taken in a location where the max depth was  
82 around 2.35 m.

83 Water for the time-depth-series was collected using a depth-discrete Limnos tube-sampler  
84 (Limnos, Poland) and the water was subsequently filtered through a Sterivex filter (0.22  $\mu\text{m}$ )  
85 and the filters were stored immediately in liquid nitrogen for later DNA extraction. Water to  
86 be used for both growth media and inoculum was collected from the anoxic layer on the sixth  
87 sampling occasion of the lake in April 2016 and again in September 2017.

88 The water for media was collected using the same depth-discrete Limnos tube-sampler  
89 (Limnos, Poland) and was quickly poured into 1 litre Schott bottles which were filled and let  
90 to overflow to remove all the oxygenic water prior to closing the bottles. These bottles were  
91 then kept in the dark at 4°C for 2 days to ensure anoxia. The water for media was filtered  
92 twice through 0.2 µm Sterivex filters (Millipore) inside the anaerobic glove box, and the  
93 filtered-sterilized media was collected in a sterile Schott bottle and closed. These bottles were  
94 further exposed to UV light for 10 min.

95 The inoculum for the cultures was collected using the Limnos tube-sampler in a falcon tube  
96 and was then flash frozen with liquid nitrogen and kept in -80 °C until the cultures were  
97 established. The following steps of the preparation were performed under anoxic atmosphere  
98 using an anaerobic glove box.

99

#### 100 *Preparation of serum bottles, cell inoculant and cultures*

101 20 ml serum bottles, crimps, and stoppers were autoclaved at 120°C for 20 min. To limit the  
102 risk of potential bactericides such as benzyltoluenes and phenylalkanes, the stoppers were  
103 autoclaved submerged in deionized water, and subsequently rinsed and boiled in sterile  
104 deionized water and finally cooled in sterile deionized water. After autoclaving, the serum  
105 bottles were sealed with these sterilised and detoxified butyl rubber stoppers and aluminium  
106 crimps. The incubation vessels were assembled under a laminar flow, using autoclaved tools,  
107 before being flushed at least 3 times with nitrogen to remove O<sub>2</sub>. To maintain the sterility of  
108 the bottles during the flushing operation, new sterile needles were used for each bottle and the  
109 stoppers were carefully disinfected with 90% ethanol. Furthermore a 0.2 µm filter was used  
110 to prevent contamination from the N<sub>2</sub> gas flow.

111 The sealed sterile and anaerobic serum bottles were supplemented with 10 ml of media,  
112 a.k.a. filtered lake water. Subsamples of the unfiltered lake water from Lomtjärnan April

113 2016 (average  $5 \times 10^6$  cells/ml) and September 2017 were run through a flow cytometer to  
114 estimate cell concentration. Based on those values, another subsample, not exposed to the  
115 atmosphere was diluted with lake-water-media to approximately 50 cells/ml. To inoculate  
116 the bottles, 1 ml of this 50 cells/ml solution was then injected using sterile needles and  
117 syringes into the 20 ml serum bottles. The number of cultures prepared were: 98 from 2016  
118 and 79 from 2017. A few bottles were incubated without inoculum as media control cultures.  
119 To test for the potential for anoxic methane oxidation 4 ml of a mix of CH<sub>4</sub> and CO<sub>2</sub> with a  
120 ratio of 80/20 % were injected into each bottle (Figure 1B).

121 Bottles were then incubated at 11°C for two months in the dark, to mimic lake conditions, for  
122 the samples taken in the autumn and under dim light for the samples collected in the spring.  
123 After the two-month incubation, 1 ml of the headspaces was sampled for gas analysis.  
124 Methane content was measured using the gas analyser Biogas 5000 (Geotechnical  
125 Instruments, UK) and gas chromatography (Clarus 500, Perkin Elmer, USA, Polyimide  
126 Uncoated capillary column 5m x 0.32mm, FID detector). At the same time as gas sampling  
127 200 µl of the cultures were collected and preserved at -80°C for DNA analysis.

128

#### 129 *16S rRNA gene amplicon preparation and sequencing*

130 DNA was amplified directly from 1 µl of culture. Library preparation for 16S rRNA gene  
131 analysis was done following a two-steps Polymerase Chain Reaction (PCR) protocol, as  
132 described in Mondav et al 2020 (11). All PCRs were conducted in 20 µl of volume using 0.02  
133 U/µl Phusion high fidelity DNA polymerase, 1X Q5 reaction buffer (NEB, UK), 0.25 µM  
134 primers and 200 µM dNTP mix and 1 µl mixed culture template. The first step was  
135 performed in triplicate with primers 341F (3'-CCTACGGGNGGCWGCAG-5') and 805NR  
136 (3'-GACTACNVGGGTATCTAA-5') (13). The thermal program consisted of 20 cycles with  
137 an initial 98°C denaturation step for 10 min, a cycling program of 98°C for 10 seconds, 48°C

138 for 30 seconds, and 72°C for 30 seconds and a final elongation step at 72°C for 2 minutes.  
139 Triplicate PCR reactions were then pooled and purified with magnetic beads (Sera-Mag™  
140 Select, GE Healthcare, Chicago, United States of America), and 2 µl of the purified products  
141 were used as a template for a second stage PCR, where indexed primers were added. The  
142 second thermal program consisted of 15 cycles with an initial 98°C denaturation step for 30  
143 seconds, a cycling program of 98°C for 10 seconds, 66°C for 30 seconds, and 72°C for 30  
144 seconds and a final elongation step at 72°C for 2 minutes. Following amplification, PCR  
145 products were again purified with magnetic beads and quantified with Qubit™ using the  
146 Qubit™ dsDNA HS Assay Kit (Invitrogen™). Finally, 15.6 µg of each indexed and purified  
147 PCR product were pooled before submission of the sample to the Science for Life Laboratory  
148 SNP/SEQ sequencing facility hosted by Uppsala University (Uppsala, Sweden). Sequencing  
149 was done using Illumina Miseq in paired-end mode with 300bp and v3 chemistry.

150

#### 151 *Amplicon bioinformatics*

152 Sequence processing was performed with Mothur 1.41.0 following the MiSeq SOP (14), with  
153 the exception that clustering to operational taxonomic units (OTUs) was done using  
154 VSEARCH (15) as implemented in Mothur (16). Taxonomy was assigned against the Silva  
155 132 database (17). Amplicon sets were separated into groups of sample or inoculant origin:  
156 time-depth-series lake communities, anaerobic lake cultures 2016, anaerobic lake cultures  
157 2017, and 2 un-inoculated media controls. Nine lake-2017 cultures produced only a few  
158 sequences (<20) and were removed from the dataset. Remaining sequences were then  
159 subsampled once using Qiimes (18) single rarefaction to an even depth of 600 reads per  
160 sample for the un-inoculated media, and 2000 reads per sample for all others. This resulted in  
161 final sample counts: 35 lake time-depth-series, 93 lake-2016 cultures and 70 lake-2017  
162 cultures. These normalized OTU tables were used for compositional and comparative

163 analyses. Column graphs of the ten most abundant phylotypes from each dataset were made  
164 for compositional analyses. OTU tables were processed and visualised in R 4.0.3 (19) using  
165 phyloseq 1.34.0 (20) and ggplot2 (21).

166 Prior to co-occurrence analysis for network visualisation, OTUs present in less than 10% of  
167 each culture group, 50% of the lake water samples, or with a relative abundance always  
168 below 1 % were removed. This was done to reduce sparcity to below 50%. A network  
169 ensemble approach was used where any correlation (edge) between OTUs (node) that was  
170 found in at least two of the three following methods was included in the final visualisation:  
171 SPIEC-EASI (22), SparcCC (23), and Pearsons correlation. All co-occurrence methods were  
172 implemented in R 4.0.3 using spiec-easi 1.1.1 for SPIEC-EASI, SparcCC and the psych 2.1.3  
173 package for Pearsons correlation. Networks were visualised in cytoscape.

174 To identify communities that had unbalanced methane cycling (flux), all cultures that had a  
175 recorded change in methane concentration and all cultures that had at least one phylotype  
176 associated with methane generation or consumption were retained and analysed for OTU co-  
177 occurrence.

178

#### 179 *Data availability and source code*

180 All scripts used to calculate network correlations are available at:  
181 [https://github.com/rmondav/methane\\_cycling\\_networks](https://github.com/rmondav/methane_cycling_networks), v1.0.0 recorded at  
182 <https://doi.org/10.5281/zenodo.5531947>. Time-depth-series amplicons are available under  
183 BioProject PRJEB27633 (12). Mixed culture sequence data has been deposited at the  
184 European Nucleotide Archive (ENA) at EMBL-EBI under accession number BioProject  
185 PRJEB48661 (<https://www.ebi.ac.uk/ena/browser/view/PRJEB48661>).

186

## 187 **Results**



188 *Change in dominant lake community with depth*

189 The most abundant OTUs in the lake time-depth-series belonged to just three phyla:  
190 Bacteroidetes, Chloroflexi, and Proteobacteria. The surface lake microbial community was  
191 dominated by the  $\alpha$ -proteobacterial Rhodospirillum rubrum OTU25 and Polaromonas OTU11 and  
192 Methylobacteriaceae OTU24 while the deeper lake community was increasingly dominated by  
193 a Chlorobium OTU9 and Oscillochloris OTU21 (Fig. 1C). Polynucleobacter OTU2 was  
194 highly abundant throughout the lake water (Fig 1C) showing no preference for depth. It was  
195 also abundant in most of the mixed cultures (Fig 1D) and was present at low abundance in  
196 media controls from Sept 2017 (0.2  $\mu$ m filterable microbes).

197

198 *Communities in lakes associated with methane cycling*

199 Known methanotrophs (obligate methane consumers) in the lake time-depth-series network  
200 were associated with either a phototrophic cluster of bacteria (green circle top left) or  
201 clustered around a methanogen (gold circle top centre, Figure 2). Carbon fixing phototrophs  
202 as detected in this cluster, methanotrophs, and the methanogen are all obligate C1-carbon  
203 molecule cyclers. Sulphate-reducing bacteria were also associated with these two clusters.  
204 The Oscillochloris OTU21 and Chlorobium OTU9 were dominant phylotypes of deeper lake  
205 (green circle Figure 2). The methanotroph Methylobacteriaceae OTU24 and Polaromonas  
206 OTU11 (grey circle bottom Figure 2) were dominant in lake Lomtjärnan surface waters (Fig  
207 1B). This cluster (grey circle) was negatively correlated to the other methanotrophs, the  
208 phototrophs and the methanogen. Methylobacteriaceae (facultative methane consumers) had no  
209 clear association with any of these metabolic clusters.

210

211 *Percentage of mixed cultures with growth varied with inoculum source*

212 All inoculated cultures from the 2016 inoculum grew and produced sequences, while 71% of  
213 the cultures from 2017 sampling produced sequences. Despite similar culture conditions,  
214 there were distinct differences in the dominant genera in the cultures inoculated with water  
215 samples from early spring 2016 compared to autumn 2017 (Fig. 1D).

216

#### 217 *Abundant lineages can both pass through and be retained by 0.22 $\mu$ m filters*

218 On average half of the top ten most abundant phylotypes in the time-depth-series and the  
219 2017 culture-series were also detected in the media control sequenced from 2017.  
220 Specifically, five of the most prevalent phylotypes in the 2017 cultures (Pelomonas,  
221 Betaproteobacteriales - T34, Polynucleobacter, Sphingomonas, and Staphylococcus) were  
222 also detected in the 2017 media control. Seven of the top 25 most abundant OTUs in the  
223 time-depth series (Polaromonas, Polynucleobacter, Rhodoferrax, Betaproteobacteriales - T34,  
224 an unclassified genus of the Sporichthyaceae family, Flavobacterium, and an unclassified  
225 genus of Burkholderiaceae) were abundant in media controls.

226

#### 227 *Detection of methane cycling phylotypes does not always correlate to methane flux* 228 *measurements*

229 The majority (91%) of cultures had no detectable change in methane concentration or (60%)  
230 had no known methane cycling phylotypes (Figure 3A). Of note in our search for new  
231 organisms with a putative role in methane cycling were the 5% of cultures that had methane  
232 flux but no methane cycling phylotypes detected. Also of note were the 36 % of mixed  
233 cultures where obligate methane cycling phylotypes were detected but no methane flux was  
234 recorded. These two culture groups were noted and selected for further investigation.

235

#### 236 *Putative cohorts and potential newcomers to methane cycling*

237 Due to the poor correlation between methane flux and methane cycling phylotypes, the co-  
238 occurrence patterns of the cultures of note were examined. Organisms detected uniquely in  
239 cultures that had unexplained methane concentration were recorded and a putative role in  
240 methane cycling proposed (Table 1). Eight microbes associated with the production of  
241 methane without detection of archaeal methanogens were noted by “CH<sub>4</sub> production without  
242 methanogen”. One of these candidates, *Rhodopseudomonas*, is already annotated as a  
243 putative methane producer via the recently documented Fe-only nitrogenase methane release  
244 pathway (24, 25). Another cohort candidate, *Desulfobulbaceae*, is a putative sulphate reducer.  
245 Many cultures had abundant obligate methane consumers but no change in methane  
246 concentration, twenty-five microbes were uniquely associated with these cultures and were  
247 noted with “CH<sub>4</sub> balance in the presence of methanotroph”. There were many *Patescibacteria*  
248 and one putative ammonia oxidizer, *Nitrosomonadaceae*, in this group. Six bacteria  
249 associated with consumption of methane without detection of methane consumers were noted  
250 by “CH<sub>4</sub> consumption without CH<sub>4</sub> consumer”. In total, 39 lineages were identified as  
251 potential contributors to methane cycling assemblages.

252

## 253 **Discussion**

### 254 *Assembly of microbial communities is cell density and diversity dependent*

255 The 71 % to 100 % success rate of culturing in this experiment is in stark contrast to the 10%  
256 to 30% success rate of dilution to extinction where only a few to maybe 20 cells are used in  
257 inoculant mixed cultures (11, 26). It therefore seems that around 50 cells of a natural  
258 community per inoculum (for anaerobic cultures from Lake Lomtjärnan) capture sufficient  
259 metabolic breadth to form a functional self-sustaining non-photoc community, or cohorts.  
260 This for the first time places an upper limit on the minimum metabolic diversity required for  
261 functional (anaerobic) aquatic cohorts (27, 28).

262

263 *Filterable microbes play a significant role in natural and laboratory systems*

264 A growing literature has discussed and evaluated the aquatic microbial filterable microbes in  
265 relation to the concept and efficacy of filter sterilisation of media used for laboratory  
266 culturing and environmental role (29–32). Here we also found that some phylotypes e.g.,  
267 *Polynucleobacter*, can both pass through filters to be detected in filter ‘sterilised’ media, and  
268 be captured on filters as seen here in the time-depth-series. While the debate over whether  
269 filter sterilisation works is mostly complete, a discussion on the effect on abundance  
270 estimates of the loss of the filterable microbes might be worth re-opening.

271

272 *Associations between methanotrophs and other lifestyles in the lake*

273 The lake time-series network shows an association between photoautotrophic *Chlorobium*, a  
274 methanotrophs, and sulphate reducing bacteria. This connection could be, for example, via  
275 carbon fixation by the autotrophic bacteria which also oxidise sulphur species to sulphate  
276 which is then consumed by the sulphate reducers. The *Methylobacter* phylotype, based on  
277 associations visualised in the network, is not reliant on proximity to a methanogen to thrive  
278 but rather is integral to the phototrophic cohort. The remainder of the methanotrophs in the  
279 cluster are associated with a methanogen and sulphate reducers. One of these sulphate  
280 reducers, *Desulfobulbaceae* is a putative methane consumer cohort member, while the other,  
281 *Geobacter*, is a known consort of *Methanotherix* (synonym *Methanosaeta* (40)) whereby  
282 direct electron transfer allows the methanogen to switch to CO<sub>2</sub> utilisation for methane  
283 generation (44, 45). Methane is then released into the water and consumed by the cohort of  
284 methanotrophs.

285 Except for two cyanobacteria OTUs (*Planktothrix* and *Pseudoanabaena*) most of the taxa in  
286 the green and gold circles are associated with oxic-anoxic interfaces. Besides the phototrophs

287 all of the taxa present in the upper cohort and correlated to methanotrophs are potential  
288 microaerophiles e.g. Polyangjaceae or Gallionaceae (33–35). Also included in the circles  
289 are potential anaerobe with known ability to live in microaerophile condition like Geobacter,  
290 or Rhodocyclaceae a taxa known to use a wide range of electron acceptor, including but not  
291 limited to O<sub>2</sub> (36). These correlations between methanotrophs and taxa associated with the  
292 oxic anoxic interface is in line with the fact that this interface is a hotspot for methanotrophy  
293 (37–39). Based only on correlation it is impossible to tell if the cooccurrence of different  
294 OTU is due to shared environmental preference of by necessary interactions. The fact that all  
295 the organisms represented in the gold and green circles appear to favorize low oxygen  
296 environment suggests that the cooccurrence might be driven by environmental preferences. It  
297 is nevertheless interesting to observe that three different OTUs attributed to methanotrophic  
298 taxa are directly correlated to a methanogen, Methanotrix (synonym Methanosaeta (40)).  
299 The presence of an archaeal methanogen in a potentially oxic environment might seem  
300 surprising, but again there is also mounting evidence that methanogenesis isn't limited to  
301 anoxic environments (41, 42). Furthermore Methanotrix is among the methanogen with a  
302 potential to thrive in oxic conditions (42, 43). Interestingly though the Methanotrix OTU  
303 correlates with two OTUs that lean more on the anaerobic side of the interface (Geobacter  
304 and Crenothrix).

305 Others interesting correlation are the ones with iron cycling phylotypes (i.e Geobacter and  
306 Gallionaceae). Indeed both methanogen and methanotrophs have high iron demand for  
307 cofactor production (46). Furthermore, it has been suggested that interactions can be  
308 favorable to methanotrophs (47, 48). But if notable it is, again, impossible to clearly state the  
309 nature of the relation between those methane cycling taxa with the iron cycling ones.

310

311 All in all, the clusters in the top of the figure suggest that most of the methanotrophs detected  
312 are attached to an environment with little oxygen favorizing taxa with the ability to deal with  
313 change in O<sub>2</sub> concentration through mobility (like Gallionella or Chlorflexi) or metabolic  
314 plasticity (e.g Chloroflexi or Rhodocycladeae). Interestingly, the Methylococcales OTU  
315 abundances correlates with both anoxic leaning OTU (Chrenothrix, Methanothrix, Geobacter)  
316 and an oxygenic phototroph (Planktothrix and Pseudanabaena, both cyanobacteria). This  
317 again suggest microoxic condition, and is in line with work suggesting that aerobic  
318 methanotrophy can be enhanced by phototroph in low oxygen environment (49).

319

320 The most probable explanation for the negative correlation between the upper circle clusters  
321 (Figure 2) and the grey circle cluster in the bottom of the figure are due to spatial separation  
322 likely controlled by temperature. Several OTU present in the grey cluster belongs to taxa  
323 including both aerobic and anaerobic species like Polaromonas, Flavobacterium or  
324 Burkholderiaceae. Both Polaromonas and Flavobacterium are generally considered  
325 psychrophilic and psychrotolerant taxa respectively (50, 51) (52). Furthermore Both  
326 Pedobacter and Rhodoferrax also include psychrophilic taxa (53, 54). The association of these  
327 psychrophilic and tolerant taxa with the surface water, might be explained considering that  
328 sampling was performed during the ice-covered season it make sense as during winter,  
329 stratification is inverted, with the coldest water found at the surface directly beneath ice. It  
330 seems therefor very likely that the grey cluster is associated with cold temperature compared  
331 to rather than by oxygen concentration.

332

333 *Associations between methanotrophs and other lifestyles in the cohorts in model communities*

334 Over the last two decades there has been a large increase in the catalogued number of  
335 microbes and metabolic pathways capable of generating, releasing, or consuming methane

336 (55, 56). Both increases are likely to continue as we explore deeper genomic and metabolic  
337 space. For these reasons it is not a surprise that methane consumption and production did not  
338 correlate clearly with detection of known methane cycling phylotypes. It was surprising  
339 however, the degree to which these were decoupled. It therefore not clear if this uncoupling is  
340 due to poor flux detection, or low abundance of methane cycling organisms. Previously, it  
341 has been demonstrated that methanotroph abundance can be uncoupled from methane  
342 oxidation rates (58–60).

343

344 The generation here of a list of 39 novel phylotypes that may be directly or indirectly  
345 involved in methane cycling is a mere indicator of how much more work can be done to  
346 identify key players effecting cycling of methane and other C1 molecules.

347 We hypothesize that the participate in methane cycle is not only related to the presence of  
348 organisms with the known ability to produce or use methane, but that their cohorts as found  
349 in the model communities might be key controllers in methane cycling.

350

### 351 **Acknowledgments**

352 SLG was supported by a SciLifeLab fellowship, a Stipend from King Carl XVI Gustav's  
353 science foundation to research methane oxidation in lakes. SP was support by a SciLifeLab  
354 fellowship. Field, laboratory, and DNA amplicon sequencing was enabled by grants from  
355 Olsson-Borghs Stiftelse.

356 Computations were enabled by resources in projects 2020-5-529 & 2020-15-261 and data  
357 storage projects 2020-6-164 & 2020-16-196 provided by the Swedish National Infrastructure  
358 for Computing (SNIC) at UPPMAX which is partially funded by the Swedish Research  
359 Council through grant agreement no. 2018-05973.

360 SP, GM, SLG conceived of and implemented field and laboratory research. SP and SLG  
361 obtained financial and material resources while SP and RM obtained computational  
362 resources. RM and SLG wrote and implemented scripts for analysis and visualization of  
363 results. RM and SP drafted the manuscript and all authors contributed to discussions, editing,  
364 and approval of final manuscript. RM curated data and scripts. SP and SLG supervised and  
365 SLG coordinated the project.

366

### 367 **References**

- 368 1. Forster P, Ramaswamy V, Artaxo P, Berntsen T, Betts R, Fahey DW, Haywood J,  
369 Lean J, Lowe DC, Myhre G, Nganga J, Prinn R, Raga G, Schulz M, Dorland R Van. 2007.  
370 Changes in Atmospheric Constituents and in Radiative ForcingClimate Change 2007: The  
371 Physical Science Basis. Contribution of Working Group I to the Fourth Assessment Report of  
372 the Intergovernmental Panel on Climate Change, AR4 ed. Cambridge University Press,  
373 Cambridge.
- 374 2. Fernández-Amador O, Francois JF, Oberdabernig DA, Tomberger P. 2020. The  
375 methane footprint of nations: Stylized facts from a global panel dataset. *Ecol Econ*  
376 170:106528.
- 377 3. Frenzel P, Thebrath B, Conrad R. 1990. Oxidation of methane in the oxic surface  
378 layer of a deep lake sediment (Lake Constance). *FEMS Microbiol Ecol* 73:149–158.
- 379 4. Kankaala P, Huotari J, Peltomaa E, Saloranta T, Ojala A. 2006. Methanotrophic  
380 activity in relation to methane efflux and total heterotrophic bacterial production in a  
381 stratified, humic, boreal lake*Limnol. Oceanogr.*
- 382 5. Bastviken D, Tranvik LJ, Downing JA, Crill PM, Enrich-prast A. 2011. the  
383 Continental Carbon Sink. *Science* (80- ) 331:6.



- 384 6. Mayr M, Zimmermann M, Dey J, Wehrli B, Bürgmann H. 2020. Lake mixing regime  
385 selects methane-oxidation kinetics of the methanotroph assemblage. *Biogeosciences Discuss*  
386 1–15.
- 387 7. Sawakuchi HO, Martin G, Peura S, Bertilsson S, Karlsson J, Bastviken D. 2021.  
388 Phosphorus Regulation of Methane Oxidation in Water From Ice-Covered Lakes. *J Geophys*  
389 *Res Biogeosciences* 126:e2020JG006190.
- 390 8. Oswald K, Milucka J, Brand A, Littmann S, Wehrli B, Kuypers MMM, Schubert CJ.  
391 2015. Light-dependent aerobic methane oxidation reduces methane emissions from  
392 seasonally stratified lakes. *PLoS One* 10:e0132574.
- 393 9. Garcia S. 2016. Mixed cultures as model communities: hunting for ubiquitous  
394 microorganisms, their partners, and interactions. *Aquat Microb Ecol* 77:79–85.
- 395 10. Garcia SL, Buck M, McMahon KD, Grossart H-P, Eiler A, Warnecke F. 2015.  
396 Auxotrophy and intrapopulation complementarity in the ‘interactome’ of a cultivated  
397 freshwater model community. *Mol Ecol* 24:4449–4459.
- 398 11. Mondav R, Bertilsson S, Buck M, Langenheder S, Lindström ES, Garcia SL. 2020.  
399 Streamlined and abundant bacterioplankton thrive in functional cohorts. *mSystems* 5:e00316-  
400 20.
- 401 12. Garcia SL, Szekely AJ, Bergvall C, Schattenhofer M, Peura S. 2019. Decreased Snow  
402 Cover Stimulates Under-Ice Primary Producers but Impairs Methanotrophic Capacity.  
403 *mSphere* 4.
- 404 13. Herlemann DP, Labrenz M, Jürgens K, Bertilsson S, Waniek JJ, Andersson AF. 2011.  
405 Transitions in bacterial communities along the 2000-km salinity gradient of the Baltic Sea.  
406 *ISME J* 5:1571–9.
- 407 14. Kozich JJ, Westcott SL, Baxter NT, Highlander SK, Schloss PD. 2013. Development  
408 of a Dual-Index Sequencing Strategy and Curation Pipeline for Analyzing Amplicon

- 409 Sequence Data on the MiSeq Illumina Sequencing Platform. *Appl Environ Microbiol*  
410 79:5112–5120.
- 411 15. Rognes T, Flouri T, Nichols B, Quince C, Mahé F. 2016. VSEARCH: a versatile open  
412 source tool for metagenomics. *PeerJ* 4:e2584.
- 413 16. Schloss PD, Westcott SL, Ryabin T, Hall JR, Hartmann M, Hollister EB, Lesniewski  
414 RA, Oakley BB, Parks DH, Robinson CJ, Sahl JW, Stres B, Thallinger GG, Van Horn DJ,  
415 Weber CF. 2009. Introducing mothur: Open-source, platform-independent, community-  
416 supported software for describing and comparing microbial communities. *Appl Environ*  
417 *Microbiol* 75:7537–7541.
- 418 17. Quast C, Pruesse E, Yilmaz P, Gerken J, Schweer T, Yarza P, Peplies J, Glöckner FO.  
419 2013. The SILVA ribosomal RNA gene database project: improved data processing and web-  
420 based tools. *Nucleic Acids Res* 41:D590-6.
- 421 18. Caporaso JG, Kuczynski J, Stombaugh J, Bittinger K, Bushman FD, Costello EK,  
422 Fierer N, Peña AG, Goodrich JK, Gordon JI, Huttley GA, Kelley ST, Knights D, Koenig JE,  
423 Ley RE, Lozupone CA, McDonald D, Muegge BD, Pirrung M, Reeder J, Sevinsky JR,  
424 Turnbaugh PJ, Walters WA, Widmann J, Yatsunenko T, Zaneveld J, Knight R. 2010. QIIME  
425 allows analysis of high- throughput community sequencing data. *Nat Methods* 7:335–336.
- 426 19. R Core Development Team. 2015. R: a language and environment for statistical  
427 computing, 3.2.1. Doc Free available internet <http://www.r-project.org>.
- 428 20. McMurdie PJ, Holmes S. 2013. phyloseq: An R Package for Reproducible Interactive  
429 Analysis and Graphics of Microbiome Census Data. *PLoS One* 8:e61217.
- 430 21. Ginestet C. 2011. ggplot2: Elegant Graphics for Data Analysis. *J R Stat Soc Ser A*  
431 (Statistics Soc 174:245–246).

- 432 22. Kurtz ZD, Müller CL, Miraldi ER, Littman DR, Blaser MJ, Bonneau RA. 2015.  
433 Sparse and Compositionally Robust Inference of Microbial Ecological Networks. PLOS  
434 Comput Biol 11:e1004226.
- 435 23. Friedman J, Alm EJ. 2012. Inferring Correlation Networks from Genomic Survey  
436 Data. PLoS Comput Biol 8:e1002687.
- 437 24. Fixen KR, Zheng Y, Harris DF, Shaw S, Yang Z-Y, Dean DR, Seefeldt LC, Harwood  
438 CS. 2016. Light-driven carbon dioxide reduction to methane by nitrogenase in a  
439 photosynthetic bacterium. Proc Natl Acad Sci 113:10163–10167.
- 440 25. McRose DL, Zhang X, Kraepiel AML, Morel FMM. 2017. Diversity and activity of  
441 alternative nitrogenases in sequenced genomes and coastal environments. Front Microbiol.
- 442 26. Henson MW, Lanclos VC, Pitre DM, Weckhorst JL, Lucchesi AM, Cheng C,  
443 Temperton B, Thrash JC. 2020. Expanding the diversity of bacterioplankton isolates and  
444 modeling isolation efficacy with large-scale dilution-to-extinction cultivation. Appl Environ  
445 Microbiol 86.
- 446 27. Yu X, Polz MF, Alm EJ. 2019. Interactions in self-assembled microbial communities  
447 saturate with diversity. ISME J 13:1602–1617.
- 448 28. Pascual-García A, Bonhoeffer S, Bell T. 2020. Metabolically cohesive microbial  
449 consortia and ecosystem functioning. Philos Trans R Soc Lond B Biol Sci 375:20190245.
- 450 29. Hahn MW. 2004. Broad diversity of viable bacteria in “sterile” (0.2 µm) filtered  
451 water. Res Microbiol 155:688–691.
- 452 30. Nakai R. 2020. Size matters: Ultra-small and filterable microorganisms in the  
453 environment. Microbes Environ.
- 454 31. Ghuneim LAJ, Distaso MA, Chernikova TN, Bargiela R, Lunev EA, Korzhenkov  
455 AA, Toshchakov S V., Rojo D, Barbas C, Ferrer M, Golyshina O V., Golyshin PN, Jones

- 456 DL. 2021. Utilization of low-molecular-weight organic compounds by the filterable fraction  
457 of a lotic microbiome. *FEMS Microbiol Ecol* 97:1–16.
- 458 32. Maejima Y, Kushimoto K, Muraguchi Y, Fukuda K, Miura T, Yamazoe A, Kimbara  
459 K, Shintani M. 2018. Proteobacteria and Bacteroidetes are major phyla of filterable bacteria  
460 passing through 0.22  $\mu\text{m}$  pore size membrane filter, in Lake Sanaru, Hamamatsu, Japan.  
461 *Biosci Biotechnol Biochem* 82:1260–1263.
- 462 33. Pedersen K. 2011. Gallionella, p. 411–412. In Reitner, J, Thiel, V (eds.),  
463 *Encyclopedia of Geobiology*. Springer Netherlands, Dordrecht.
- 464 34. Hanert HH. 2006. The Genus Gallionella, p. 990–995. In Dworkin, M, Falkow, S,  
465 Rosenberg, E, Schleifer, K-H, Stackebrandt, E (eds.), *The Prokaryotes: Volume 7:*  
466 *Proteobacteria: Delta, Epsilon Subclass*. Springer, New York, NY.
- 467 35. Garcia R, Müller R. 2014. The Family Polyangiaceae, p. 247–279. In Rosenberg, E,  
468 DeLong, EF, Lory, S, Stackebrandt, E, Thompson, F (eds.), *The Prokaryotes:*  
469 *Deltaproteobacteria and Epsilonproteobacteria*. Springer, Berlin, Heidelberg.
- 470 36. Oren A. 2014. The Family Methanoregulaceae, p. 253–258. In Rosenberg, E,  
471 DeLong, EF, Lory, S, Stackebrandt, E, Thompson, F (eds.), *The Prokaryotes: Other Major*  
472 *Lineages of Bacteria and The Archaea*. Springer, Berlin, Heidelberg.
- 473 37. Rissanen AJ, Saarenheimo J, Tirola M, Peura S, Aalto SL, Karvinen A, Nykanen H.  
474 2018. Gammaproteobacterial methanotrophs dominate methanotrophy in aerobic and  
475 anaerobic layers of boreal lake waters. *Aquat Microb Ecol* 81:257–276.
- 476 38. Reis PCJ, Thottathil SD, Ruiz-González C, Prairie YT. 2020. Niche separation  
477 within aerobic methanotrophic bacteria across lakes and its link to methane oxidation rates.  
478 *Environ Microbiol* 22:738–751.
- 479 39. Samad MS, Bertilsson S. 2017. Seasonal Variation in Abundance and Diversity of  
480 Bacterial Methanotrophs in Five Temperate Lakes. *Front Microbiol* 8.

- 481 40. Boone DR. 1991. Strain GP6 is proposed as the neotype strain of *Methanotherix*  
482 *soehngeni*(VP) pro synonym. *Methanotherix concilii*(VP) and *Methanosaeta concilii*(VP):  
483 Request for an opinion. *Int J Syst Bacteriol* 41:588–589.
- 484 41. Bogard MJ, del Giorgio PA, Boutet L, Chaves MCG, Prairie YT, Merante A, Derry  
485 AM. 2014. Oxic water column methanogenesis as a major component of aquatic CH<sub>4</sub> fluxes.  
486 *Nat Commun* 5:5350.
- 487 42. Angle JC, Morin TH, Solden LM, Narrowe AB, Smith GJ, Borton MA, Rey-Sanchez  
488 C, Daly RA, Mirfenderesgi G, Hoyt DW, Riley WJ, Miller CS, Bohrer G, Wrighton KC.  
489 2017. Methanogenesis in oxygenated soils is a substantial fraction of wetland methane  
490 emissions. *Nat Commun* 8:1567.
- 491 43. Jetten MS, Stams AJ, Zehnder AJ. 1989. Purification and characterization of an  
492 oxygen-stable carbon monoxide dehydrogenase of *Methanotherix soehngeni*. *Eur J Biochem*  
493 181:437–441.
- 494 44. Holmes DE, Shrestha PM, Walker DJF, Dang Y, Nevin KP, Woodard TL, Lovley  
495 DR. 2017. Metatranscriptomic evidence for direct interspecies electron transfer between  
496 *Geobacter* and *Methanotherix* species in methanogenic rice paddy soils. *Appl Environ*  
497 *Microbiol* 83.
- 498 45. Liu C, Sun D, Zhao Z, Dang Y, Holmes DE. 2019. *Methanotherix* enhances biogas  
499 upgrading in microbial electrolysis cell via direct electron transfer. *Bioresour Technol*  
500 291:121877.
- 501 46. Johnson C, England A, Munro-Ehrlich M, Colman DR, DuBois JL, Boyd ES. 2021.  
502 Pathways of Iron and Sulfur Acquisition, Cofactor Assembly, Destination, and Storage in  
503 Diverse Archaeal Methanogens and Alkanotrophs. *J Bacteriol* 203:e0011721.

- 504 47. Ho A, de Roy K, Thas O, De Neve J, Hoefman S, Vandamme P, Heylen K, Boon N.  
505 2014. The more, the merrier: heterotroph richness stimulates methanotrophic activity. *ISME J*  
506 8:1945–1948.
- 507 48. Iguchi H, Yurimoto H, Sakai Y. 2011. Stimulation of Methanotrophic Growth in  
508 Cocultures by Cobalamin Excreted by Rhizobia. *Appl Environ Microbiol* 77:8509–8515.
- 509 49. van Grinsven S, Oswald K, Wehrli B, Jegge C, Zopfi J, Lehmann MF, Schubert CJ.  
510 2021. Methane oxidation in the waters of a humic-rich boreal lake stimulated by  
511 photosynthesis, nitrite, Fe(III) and humics. *Biogeosciences* 18:3087–3101.
- 512 50. Darcy JL, Lynch RC, King AJ, Robeson MS, Schmidt SK. 2011. Global Distribution  
513 of Polaromonas Phylotypes - Evidence for a Highly Successful Dispersal Capacity. *PLoS*  
514 *One* 6:e23742.
- 515 51. Michaud L, Caruso C, Mangano S, Interdonato F, Bruni V, Lo Giudice A. 2012.  
516 Predominance of Flavobacterium, Pseudomonas, and Polaromonas within the prokaryotic  
517 community of freshwater shallow lakes in the northern Victoria Land, East Antarctica. *FEMS*  
518 *Microbiol Ecol* 82:391–404.
- 519 52. Bernardet J-F, Bowman JP. 2006. The Genus Flavobacterium, p. 481–531. In  
520 Dworkin, M, Falkow, S, Rosenberg, E, Schleifer, K-H, Stackebrandt, E (eds.), *The*  
521 *Prokaryotes: Volume 7: Proteobacteria: Delta, Epsilon Subclass*. Springer, New York, NY.
- 522 53. Viana AT, Caetano T, Covas C, Santos T, Mendo S. 2018. Environmental superbugs:  
523 The case study of Pedobacter spp. *Environ Pollut* 241:1048–1055.
- 524 54. Finneran KT, Johnsen C V., Lovley DRY 2003. *Rhodoferax ferrireducens* sp. nov., a  
525 psychrotolerant, facultatively anaerobic bacterium that oxidizes acetate with the reduction of  
526 Fe(III). *Int J Syst Evol Microbiol* 53:669–673.
- 527 55. Kurth JM, Op den Camp HJM, Welte CU. 2020. Several ways one goal—  
528 methanogenesis from unconventional substrates. *Appl Microbiol Biotechnol* 104:6839–6854.

- 529 56. Berghuis BA, Yu FB, Schulz F, Blainey PC, Woyke T, Quake SR. 2019.  
530 Hydrogenotrophic methanogenesis in archaeal phylum Verstraetearchaeota reveals the shared  
531 ancestry of all methanogens. *Proc Natl Acad Sci U S A* 116:5037–5044.
- 532 58. DeBruyn JM, Leigh-Bell JA, McKay RML, Bourbonniere RA, Wilhelm SW. 2004.  
533 Microbial Distributions and the Impact of Phosphorus on Bacterial Activity in Lake Erie. *J*  
534 *Great Lakes Res* 30:166–183.
- 535 59. Vrede K, Vrede T, Isaksson A, Karlsson A. 1999. Effects of nutrients (phosphorous,  
536 nitrogen, and carbon) and zooplankton on bacterioplankton and phytoplankton—a seasonal  
537 study. *Limnol Oceanogr* 44:1616–1624.
- 538 60. Zheng Y, Zhang L, He J-Z. 2013. Immediate effects of nitrogen, phosphorus, and  
539 potassium amendments on the methanotrophic activity and abundance in a Chinese paddy  
540 soil under short-term incubation experiment. *J Soils Sediments* 13:189–196.

541

542

543 **Figures and Table**

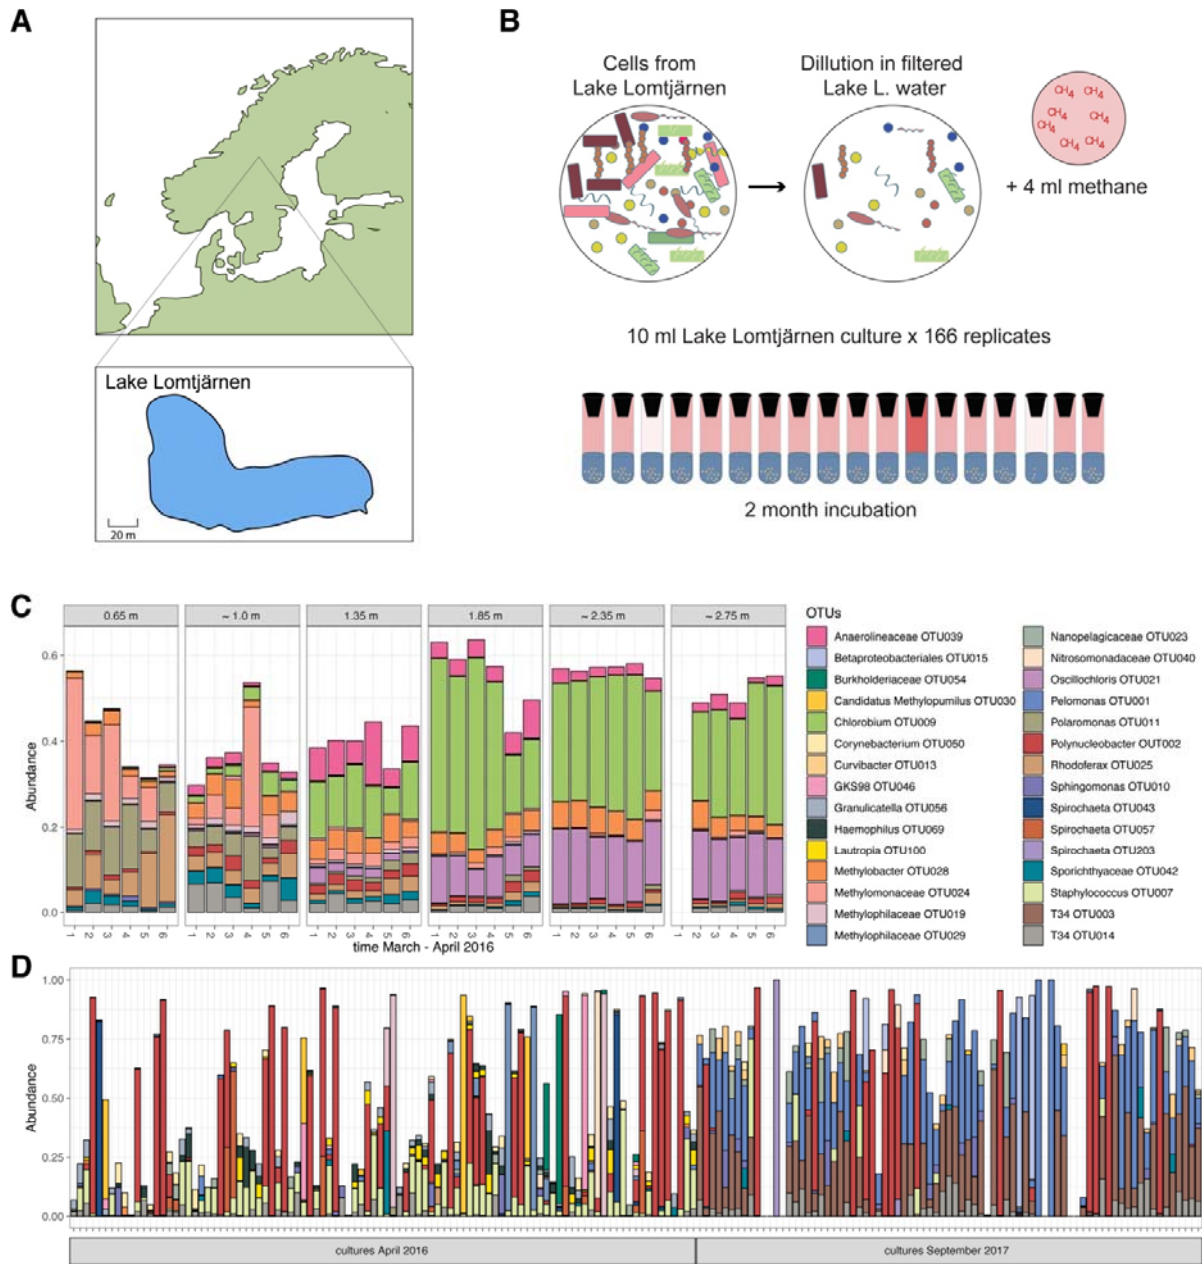

544

545

546 **Figure 1.** Sample location [A], schematic of dilution and set up of model communities [B],

547 most abundant OTUs detected in lake timeseries [C], and most abundant OTUs from model

548 communities [D]. The legend in C is also for D.

549



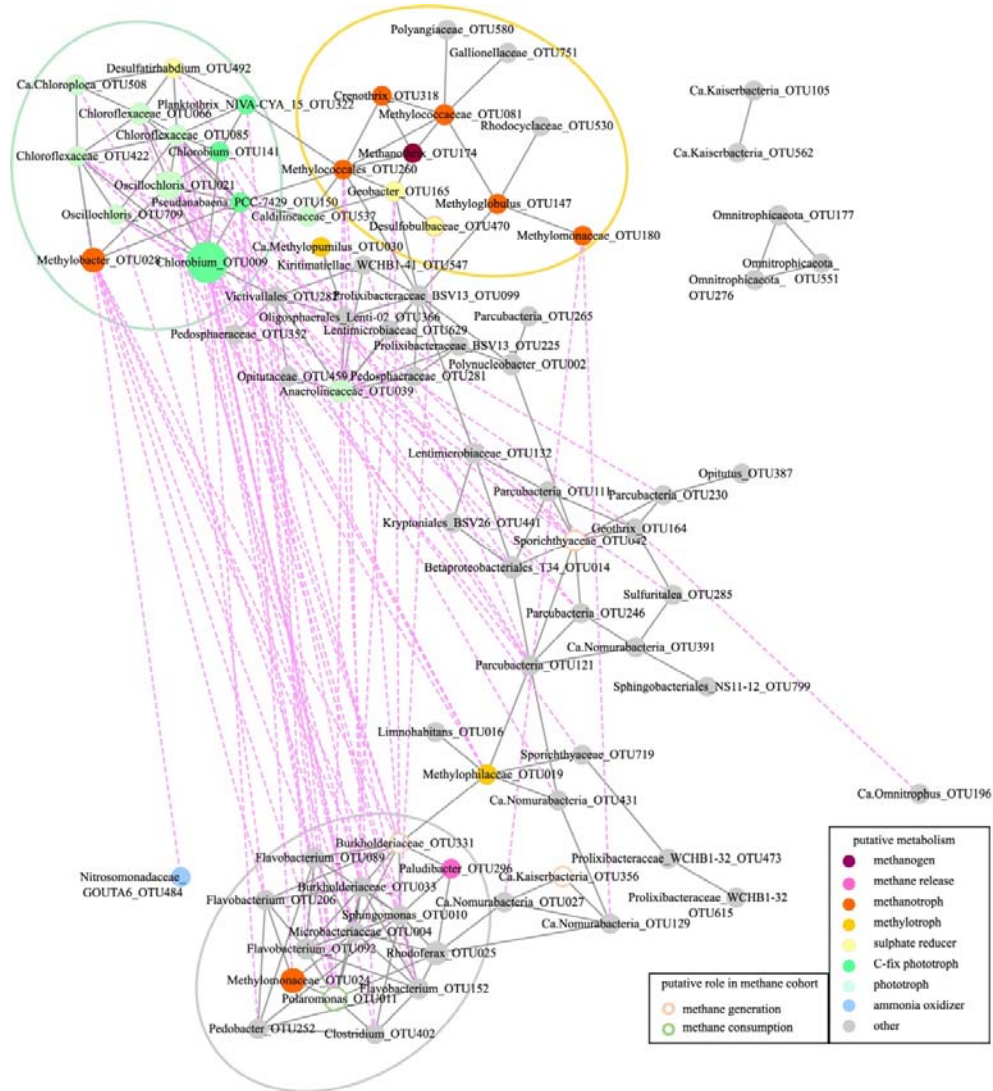

550

551 **Figure 2.** Lake time-depth-series network. Filled node-circles are OTUs with the following  
 552 color codes: methanogens-red, methanotrophs-orange, methylotrophs-golden, C-fixing  
 553 phototrophs-bright green, other phototrophs-pale green, sulphate reducers-yellow. Grey lines  
 554 show positive correlations and pink-dotted lines show negative correlations. Green, golden,  
 555 and grey bigger circles designate cohort clusters. We designated putative roles in methane  
 556 consumption from observations in the dilution model communities and they are shown in not-  
 557 filled node-circles in peach and green.

558

559

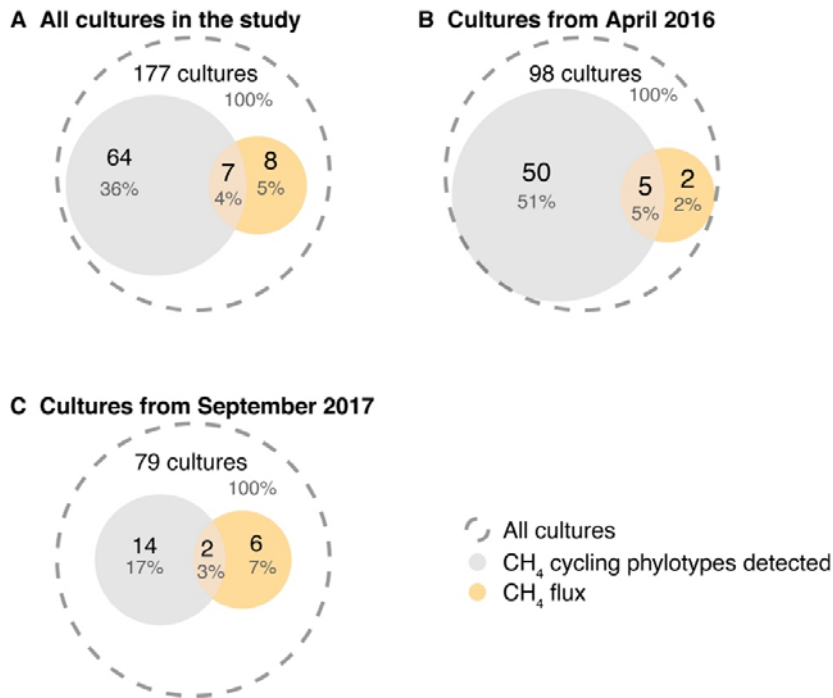

560

561

562 **Figure 3.** Venn diagram of all cultures in this study [A], cultures from April 2016 [B] and

563 cultures from September 2017 [C]. In orange the cultures with measured methane flux and in

564 grey the cultures with detection of (known) methane cycling phylotypes.

565

566

567 **Table 1.** Phylotypes in this study with a potential role in methane cycling.

| phylum          | family                   | genus                    | metabolism   | culture note                               | putative role in CH4 cycling                  |
|-----------------|--------------------------|--------------------------|--------------|--------------------------------------------|-----------------------------------------------|
| Patescibacteria | Ca.Vogelbacteria_fa      | Ca.Vogelbacteria_ge      | unknown      | CH4 production without methanogen          | CH4 producer or their cohort                  |
| Nanoarchaeaeota | Woesearchaeia_fa         | Woesearchaeia_ge         | unknown      | CH4 production without methanogen          | CH4 producer or their cohort                  |
| Patescibacteria | Ca.Adlerbacteria_fa      | Ca.Adlerbacteria_ge      | unknown      | CH4 production without methanogen          | CH4 producer or their cohort                  |
| Patescibacteria | Ca.Staskawiczbacteria_fa | Ca.Staskawiczbacteria_ge | unknown      | CH4 production without methanogen          | CH4 producer or their cohort                  |
| Proteobacteria  | Burkholderiaceae         | Burkholderiaceae_ge      | unknown      | CH4 production without methanogen          | CH4 producer or their cohort                  |
| Patescibacteria | Parcubacteria_fa         | Parcubacteria_ge         | unknown      | CH4 production without methanogen          | CH4 producer or their cohort                  |
| Proteobacteria  | Desulfobulbaceae         | Desulfobulbaceae_ge      | SO4_reductn  | CH4 production without methanogen          | methanogen cohort                             |
| Proteobacteria  | Xanthobacteraceae        | Rhodospseudomonas        | put N2, CH4  | CH4 production without methanogen          | CH4 producer                                  |
| Actinobacteria  | Corynebacteriaceae       | Corynebacterium_1        | unknown      | CH4 balance in the presence of methantroph | CH4 producing cohort or methantroph inhibitor |
| Actinobacteria  | Kineosporiaceae          | Kineosporiaceae_ge       | unknown      | CH4 balance in the presence of methantroph | CH4 producing cohort or methantroph inhibitor |
| Actinobacteria  | Micrococcaceae           | Rothia                   | unknown      | CH4 balance in the presence of methantroph | CH4 producing cohort or methantroph inhibitor |
| Actinobacteria  | Streptomycetaceae        | Streptomyces             | unknown      | CH4 balance in the presence of methantroph | CH4 producing cohort or methantroph inhibitor |
| Bacteroidetes   | SB-5                     | SB-5_ge                  | unknown      | CH4 balance in the presence of methantroph | CH4 producing cohort or methantroph inhibitor |
| Firmicutes      | Erysipelotrichaceae      | Solobacterium            | unknown      | CH4 balance in the presence of methantroph | CH4 producing cohort or methantroph inhibitor |
| Nanoarchaeaeota | Woesearchaeia_fa         | Woesearchaeia_ge         | unknown      | CH4 balance in the presence of methantroph | CH4 producing cohort or methantroph inhibitor |
| Patescibacteria | Berkelbacteria_fa        | Berkelbacteria_ge        | unknown      | CH4 balance in the presence of methantroph | CH4 producing cohort or methantroph inhibitor |
| Patescibacteria | Ca.Adlerbacteria_fa      | Ca.Adlerbacteria_ge      | unknown      | CH4 balance in the presence of methantroph | CH4 producing cohort or methantroph inhibitor |
| Patescibacteria | Ca.Azambacteria_fa       | Ca.Azambacteria_ge       | unknown      | CH4 balance in the presence of methantroph | CH4 producing cohort or methantroph inhibitor |
| Patescibacteria | Ca.Kaiserbacteria_fa     | Ca.Kaiserbacteria_ge     | unknown      | CH4 balance in the presence of methantroph | CH4 producing cohort or methantroph inhibitor |
| Patescibacteria | Ca.Moranbacteria_fa      | Ca.Moranbacteria_ge      | unknown      | CH4 balance in the presence of methantroph | CH4 producing cohort or methantroph inhibitor |
| Patescibacteria | Ca.Nomurabacteria_fa     | Ca.Nomurabacteria_ge     | unknown      | CH4 balance in the presence of methantroph | CH4 producing cohort or methantroph inhibitor |
| Patescibacteria | Ca.Staskawiczbacteria_fa | Ca.Staskawiczbacteria_ge | unknown      | CH4 balance in the presence of methantroph | CH4 producing cohort or methantroph inhibitor |
| Patescibacteria | Ca.Woesebacteria_fa      | Ca.Woesebacteria_ge      | unknown      | CH4 balance in the presence of methantroph | CH4 producing cohort or methantroph inhibitor |
| Patescibacteria | Ca.Yanofskybacteria_fa   | Ca.Yanofskybacteria_ge   | unknown      | CH4 balance in the presence of methantroph | CH4 producing cohort or methantroph inhibitor |
| Patescibacteria | CPR2_fa                  | CPR2_ge                  | unknown      | CH4 balance in the presence of methantroph | CH4 producing cohort or methantroph inhibitor |
| Patescibacteria | Parcubacteria_fa         | Parcubacteria_ge         | unknown      | CH4 balance in the presence of methantroph | CH4 producing cohort or methantroph inhibitor |
| Patescibacteria | WWE3_fa                  | WWE3_ge                  | unknown      | CH4 balance in the presence of methantroph | CH4 producing cohort or methantroph inhibitor |
| Planctomycetes  | Pirellaceae              | uncultured               | unknown      | CH4 balance in the presence of methantroph | CH4 producing cohort or methantroph inhibitor |
| Proteobacteria  | Burkholderiaceae         | Acidovorax               | unknown      | CH4 balance in the presence of methantroph | CH4 producing cohort or methantroph inhibitor |
| Proteobacteria  | Burkholderiaceae         | Ralstonia                | unknown      | CH4 balance in the presence of methantroph | CH4 producing cohort or methantroph inhibitor |
| Proteobacteria  | Coxiellaceae             | Coxiella                 | unknown      | CH4 balance in the presence of methantroph | CH4 producing cohort or methantroph inhibitor |
| Proteobacteria  | Hyphomonadaceae          | Hirschia                 | unknown      | CH4 balance in the presence of methantroph | CH4 producing cohort or methantroph inhibitor |
| Proteobacteria  | Nitrosomonadaceae        | uncultured               | NH3 oxidizer | CH4 balance in the presence of methantroph | CH4 producing cohort or methantroph inhibitor |
| Bacteroidetes   | Weeksellaceae            | Cloacibacterium          | unknown      | CH4 consumption without CH4 consumer       | CH4 consumer or their cohort                  |
| Proteobacteria  | Burkholderiaceae         | Tepidimonas              | unknown      | CH4 consumption without CH4 consumer       | CH4 consumer or their cohort                  |
| Firmicutes      | Clostridiaceae_1         | Fonticella               | unknown      | CH4 consumption without CH4 consumer       | CH4 consumer or their cohort                  |
| Proteobacteria  | Xanthomonadaceae         | Pseudoxanthomonas        | unknown      | CH4 consumption without CH4 consumer       | CH4 consumer or their cohort                  |
| Actinobacteria  | Corynebacteriaceae       | Lawsonella               | unknown      | CH4 consumption without CH4 consumer       | CH4 consumer or their cohort                  |
| Proteobacteria  | Beijerinckiaceae         | Beijerinckiaceae_ge      | unknown      | CH4 consumption without CH4 consumer       | CH4 consumer or their cohort                  |

568

569

570
